# Supplementary material for: Identification of Reference Genes for Circadian Studies on Brain Microvessels and Choroid Plexus Samples Isolated from Rats
Source: MDPI journal article supplement (doi:10.3390/biom11081227), 2021-08-17
Supplement: s1 [file s1]

# Identification of reference genes for circadian studies on brain microvessels and choroid plexus samples isolated from rats

Aleksandra Szczepkowska, András Harazin, Lilla Barna, Mária A. Deli and Janina Skipor

## SUPPLEMENTARY MATERIALS

**Supplementary Table S1** Circadian oscillation of *Bmal1* expression in brain microvessels analysed by CircWave

| BrMV - <i>Bmal1</i> vs. reference genes combinations |                            |         | r <sup>2</sup> | p-value |
|------------------------------------------------------|----------------------------|---------|----------------|---------|
| most stable genes                                    | vs. <i>Ywhaz</i>           | all     | 0.569          | 1.2E-05 |
|                                                      |                            | females | 0.784          | 1E-05   |
|                                                      |                            | males   | 0.602          | 0.01    |
|                                                      | vs. <i>Apoe</i>            | all     | 0.845          | 0       |
|                                                      |                            | females | 0.883          | 1E-07   |
|                                                      |                            | males   | 0.812          | 0.0005  |
|                                                      | vs. <i>Ywhaz/Ppia</i>      | all     | 0.558          | 1.6E-05 |
|                                                      |                            | females | 0.699          | 0.0001  |
|                                                      |                            | males   | 0.592          | 0.02    |
|                                                      | vs. <i>Ywhaz/Tbp</i>       | all     | 0.586          | 6.7E-06 |
|                                                      |                            | females | 0.805          | 4.7E-06 |
|                                                      |                            | males   | 0.602          | 0.016   |
|                                                      | vs. <i>Apoe/Rps18</i>      | all     | 0.732          | 0       |
|                                                      |                            | females | 0.845          | 1E-06   |
|                                                      |                            | males   | 0.645          | 0.009   |
|                                                      | vs. <i>Ywhaz/Ppia/Tbp</i>  | all     | 0.593          | 5E-06   |
|                                                      |                            | females | 0.769          | 1.7E-05 |
|                                                      |                            | males   | 0.616          | 0.01    |
|                                                      | vs. <i>Ywhaz/Ppia/Actb</i> | all     | 0.615          | 2.5E-06 |
|                                                      |                            | females | 0.835          | 1.3E-06 |
|                                                      |                            | males   | 0.604          | 0.01    |
| least stable genes                                   | vs. <i>Rps18</i>           | all     | 0.891          | 0       |
|                                                      |                            | females | 0.967          | 0.006   |
|                                                      |                            | males   | 0.842          | 0.0002  |
|                                                      | vs. <i>Rplp2</i>           | all     | 0.727          | 0       |
|                                                      |                            | females | 0.804          | 5E-06   |
|                                                      |                            | males   | 0.792          | 0.0008  |
|                                                      | vs. <i>Rps18/Pgk1</i>      | all     | 0.488          | 0.0002  |
|                                                      |                            | females | 0.677          | 0.0002  |
|                                                      |                            | males   | 0.505          | 0.04    |
|                                                      | vs. <i>Rplp2/Pgk1</i>      | all     | 0.807          | 0.046   |
|                                                      |                            | females | 0.957          | 0.01    |
|                                                      |                            | males   | 0.611          | 0.01    |

|  |                             |         |       |        |
|--|-----------------------------|---------|-------|--------|
|  | <i>vs. Rps18/Pgk1/Rplp2</i> | all     | 0.705 | 1E-07  |
|  |                             | females | 0.914 | 0      |
|  |                             | males   | 0.612 | 0.01   |
|  | <i>vs. Rplp2/Pgk1/Hprt1</i> | all     | 0.486 | 0.0001 |
|  |                             | females | 0.689 | 0.0001 |
|  |                             | males   | 0.522 | 0.04   |

BrMV – brain microvessels; "0"- very low p-value; all genes abbreviations are explained in the main manuscript

**Supplementary Table S2** Circadian oscillation of *Bmal1* expression in choroid plexus analysed by CircWave

| ChP - <i>Bmal1</i> vs. reference genes combinations |                             |         | r <sup>2</sup> | p-value |
|-----------------------------------------------------|-----------------------------|---------|----------------|---------|
| most stable genes                                   | <i>vs. Actb</i>             | all     | 0.975          | 0.03    |
|                                                     |                             | females | 0.422          | 0.02    |
|                                                     |                             | males   | 0.986          | 1.4E-06 |
|                                                     | <i>vs. Hprt1</i>            | all     | 0.935          | 0       |
|                                                     |                             | females | 0.932          | 2E-07   |
|                                                     |                             | males   | 0.945          | 0.02    |
|                                                     | <i>vs. Actb/Hmbs</i>        | all     | 0.977          | 0       |
|                                                     |                             | females | 0.985          | 1.1E-05 |
|                                                     |                             | males   | 0.976          | 9.3E-06 |
|                                                     | <i>vs. Hprt1/Ppia</i>       | all     | 0.932          | 7E-06   |
|                                                     |                             | females | 0.927          | 3E-07   |
|                                                     |                             | males   | 0.958          | 6.5E-05 |
|                                                     | <i>vs. Actb/Hmbs/Rplp2</i>  | all     | 0.970          | 0.0003  |
|                                                     |                             | females | 0.971          | 0.03    |
|                                                     |                             | males   | 0.989          | 5E-07   |
|                                                     | <i>vs. Hprt1/Ppia/Ywhaz</i> | all     | 0.985          | 0       |
|                                                     |                             | females | 0.986          | 3E-06   |
|                                                     |                             | males   | 0.989          | 1.4E-06 |
| least stable genes                                  | <i>vs. Apoe</i>             | all     | 0.868          | 1.4E-05 |
|                                                     |                             | females | 0.854          | 2.4E-05 |
|                                                     |                             | males   | 0.899          | 0.001   |
|                                                     | <i>vs. Apoe/Rps18</i>       | all     | 0.927          | 0       |
|                                                     |                             | females | 0.933          | 2E-07   |
|                                                     |                             | males   | 0.918          | 0.0006  |
|                                                     | <i>vs. Apoe/Rps18/Pgk1</i>  | all     | 0.952          | 0       |
|                                                     |                             | females | 0.959          | 0.0001  |
|                                                     |                             | males   | 0.947          | 0.0001  |
|                                                     | <i>vs. Apoe/Rps18/Tbp</i>   | all     | 0.950          | 0       |
|                                                     |                             | females | 0.959          | 8.3E-05 |
|                                                     |                             | males   | 0.944          | 0.0002  |
|                                                     | <i>vs. Apoe/Rps18/Hprt1</i> | all     | 0.950          | 0       |
|                                                     |                             | females | 0.952          | 0.0001  |
|                                                     |                             | males   | 0.953          | 9.6E-05 |

ChP – choroid plexus; "0"- very low p-value; all genes abbreviations are explained in the main manuscript

**Supplementary Table S3** Circadian oscillation of Bmal1 expression analysed using digital PCR.

| <b><i>Bmal1</i> expression analysed using digital PCR</b> |         | <b><math>r^2</math></b> | <b><i>p</i>-value</b> |
|-----------------------------------------------------------|---------|-------------------------|-----------------------|
| <b>BrMV</b>                                               | all     | 0.607                   | 5.4E-05               |
|                                                           | females | 0.780                   | 0.001                 |
|                                                           | males   | 0.493                   | 0.04                  |
| <b>ChP</b>                                                | all     | 0.922                   | 0                     |
|                                                           | females | 0.962                   | 4.7E-05               |
|                                                           | males   | 0.905                   | 0.001                 |

BrMV – brain microvessels; ChP – choroid plexus; "0" - very low p-value
